# Supplementary material for: Uremic Toxins and Inflammation: Metabolic Pathways Affected in Stage 5 Kidney Disease
Source: Preprints.org preprint supplement (doi:10.20944/preprints202402.0580.v1), 2024-02-09
Supplement: Supplementary file 1 [file supplementary]

## Sheet: Hoja1
Trimethylamine N-oxide	carnitine	N-Acetylcarnitine	betaine	Trimethylamine N-oxide	carnitine	N-Acetylcarnitine	betaine	Trimethylamine N-oxide	carnitine	N-Acetylcarnitine	betaine	Trimethylamine N-oxide	carnitine	N-Acetylcarnitine	betaine	Trimethylamine N-oxide	carnitine	N-Acetylcarnitine	betaine	Trimethylamine N-oxide	carnitine	N-Acetylcarnitine	betaine	Trimethylamine N-oxide	carnitine	N-Acetylcarnitine	betaine	Trimethylamine N-oxide	carnitine	N-Acetylcarnitine	betaine	Trimethylamine N-oxide	carnitine	N-Acetylcarnitine	betaine	Trimethylamine N-oxide	carnitine	N-Acetylcarnitine	betaine	Trimethylamine N-oxide	carnitine	N-Acetylcarnitine	betaine	Trimethylamine N-oxide	carnitine	N-Acetylcarnitine	betaine	Trimethylamine N-oxide	carnitine
18496322	178036640	70889792	33749156	59945891	5.38071e+07	4.76682e+07	4.15294e+07	3.53906e+07	2.92517e+07	2.31129e+07	1.6974e+07	1.08352e+07	4.69638e+06	-1.44246e+06	-7.58129e+06	-1.37201e+07	-1.9859e+07	-2.59978e+07	-32136628	-3.82755e+07	-4.44143e+07	-5.05531e+07	-5.6692e+07	-62830801	-6.89696e+07	-7.51085e+07	-8.12473e+07	-8.73861e+07	-93524974	-9.96638e+07	-1.05803e+08	-1.11941e+08	-1.1808e+08	-124219147	-1.30358e+08	-1.36497e+08	-1.42636e+08	-1.48774e+08	-154913320	-1.61052e+08	-1.67191e+08	-1.7333e+08	-1.79469e+08	-185607493	-1.91746e+08	-1.97885e+08	-2.04024e+08	-2.10163e+08	-216301666
4.27428e+06	55952460	17280624	41513836	4.8017e+07	5.53217e+07	6.26264e+07	6.99311e+07	7.72357e+07	84540425	9.18451e+07	9.91498e+07	1.06454e+08	1.13759e+08	1.21064e+08	1.28369e+08	1.35673e+08	1.42978e+08	1.50283e+08	1.57587e+08	1.64892e+08	1.72197e+08	1.79501e+08	1.86806e+08	1.94111e+08	2.01415e+08	2.0872e+08	2.16025e+08	2.23329e+08	230634092	2.37939e+08	2.45243e+08	2.52548e+08	2.59853e+08	2.67158e+08	2.74462e+08	2.81767e+08	2.89072e+08	2.96376e+08	3.03681e+08	3.10986e+08	3.1829e+08	3.25595e+08	3.329e+08	3.40204e+08	3.47509e+08	3.54814e+08	3.62118e+08	3.69423e+08	376727759
12297460	117157760	54212560	30576086	51533636	5.07227e+07	4.99118e+07	4.91008e+07	4.82899e+07	47478975	4.6668e+07	4.58571e+07	4.50462e+07	4.42352e+07	43424314	4.26134e+07	4.18024e+07	4.09915e+07	4.01806e+07	39369653	3.85587e+07	3.77478e+07	3.69369e+07	3.61259e+07	3.5315e+07	3.45041e+07	3.36931e+07	3.28822e+07	3.20713e+07	3.12603e+07	3.04494e+07	2.96385e+07	2.88275e+07	2.80166e+07	2.72057e+07	2.63947e+07	2.55838e+07	2.47729e+07	2.39619e+07	2.3151e+07	2.23401e+07	2.15291e+07	2.07182e+07	1.99073e+07	1.90963e+07	1.82854e+07	1.74745e+07	1.66636e+07	1.58526e+07	1.50417e+07
20382326	163856560	81247208	69656136	100088577	1.0661e+08	1.13131e+08	1.19652e+08	1.26173e+08	132694616	1.39216e+08	1.45737e+08	1.52258e+08	1.58779e+08	165300655	1.71822e+08	1.78343e+08	1.84864e+08	1.91385e+08	197906694	2.04428e+08	2.10949e+08	2.1747e+08	2.23992e+08	230512733	2.37034e+08	2.43555e+08	2.50076e+08	2.56598e+08	263118772	2.6964e+08	2.76161e+08	2.82682e+08	2.89204e+08	295724811	3.02246e+08	3.08767e+08	3.15288e+08	3.2181e+08	328330850	3.34852e+08	3.41373e+08	3.47894e+08	3.54416e+08	360936889	3.67458e+08	3.73979e+08	3.80501e+08	3.87022e+08	393542928
4.38073e+06	92290664	30889914	32440234	4.56948e+07	47972601	5.02504e+07	5.25282e+07	5.48059e+07	57083704	5.93615e+07	6.16393e+07	6.3917e+07	66194807	6.84726e+07	7.07504e+07	7.30281e+07	75305910	7.75837e+07	7.98615e+07	8.21392e+07	84417013	8.66948e+07	8.89726e+07	9.12503e+07	93528116	9.58059e+07	9.80837e+07	1.00361e+08	102639219	1.04917e+08	1.07195e+08	1.09473e+08	111750322	1.14028e+08	1.16306e+08	1.18584e+08	120861425	1.23139e+08	1.25417e+08	1.27695e+08	129972528	1.3225e+08	1.34528e+08	1.36806e+08	139083631	1.41361e+08	1.43639e+08	1.45917e+08	148194734
8440929	122767584	54899488	54591568	7.78208e+07	8.48792e+07	9.19376e+07	9.8996e+07	1.06054e+08	113112758	1.20171e+08	1.2723e+08	1.34288e+08	1.41346e+08	1.48405e+08	1.55463e+08	1.62521e+08	1.6958e+08	1.76638e+08	183696579	1.90755e+08	1.97813e+08	2.04872e+08	2.1193e+08	2.18988e+08	2.26047e+08	2.33105e+08	2.40164e+08	2.47222e+08	254280400	2.61339e+08	2.68397e+08	2.75456e+08	2.82514e+08	2.89572e+08	2.96631e+08	3.03689e+08	3.10747e+08	3.17806e+08	324864221	3.31923e+08	3.38981e+08	3.46039e+08	3.53098e+08	3.60156e+08	3.67215e+08	3.74273e+08	3.81331e+08	3.8839e+08	395448042
25172608	203409328	107917184	53749524	95121812	9.41457e+07	9.31695e+07	9.21934e+07	9.12173e+07	90241114	8.9265e+07	8.82888e+07	8.73127e+07	8.63366e+07	85360416	8.43843e+07	8.34081e+07	8.2432e+07	8.14559e+07	80479718	7.95036e+07	7.85274e+07	7.75513e+07	7.65752e+07	7.5599e+07	7.46229e+07	7.36467e+07	7.26706e+07	7.16945e+07	7.07183e+07	6.97422e+07	6.8766e+07	6.77899e+07	6.68138e+07	6.58376e+07	6.48615e+07	6.38853e+07	6.29092e+07	6.19331e+07	6.09569e+07	5.99808e+07	5.90046e+07	5.80285e+07	5.70524e+07	5.60762e+07	5.51001e+07	5.41239e+07	5.31478e+07	5.21717e+07	5.11955e+07
22792312	242678832	77916256	100021928	127583900	1.34277e+08	1.40969e+08	1.47662e+08	1.54354e+08	161047036	1.6774e+08	1.74432e+08	1.81125e+08	1.87818e+08	194510172	2.01203e+08	2.07895e+08	2.14588e+08	2.21281e+08	227973308	2.34666e+08	2.41359e+08	2.48051e+08	2.54744e+08	261436444	2.68129e+08	2.74822e+08	2.81514e+08	2.88207e+08	294899580	3.01592e+08	3.08285e+08	3.14977e+08	3.2167e+08	328362716	3.35055e+08	3.41748e+08	3.48441e+08	3.55133e+08	361825852	3.68518e+08	3.75211e+08	3.81904e+08	3.88596e+08	395288988	4.01982e+08	4.08674e+08	4.15367e+08	4.22059e+08	428752124
10064656	125999352	42803180	46052556	62421818	6.48986e+07	6.73753e+07	6.98521e+07	7.23288e+07	7.48056e+07	7.72823e+07	7.97591e+07	8.22358e+07	8.47126e+07	8.71893e+07	8.96661e+07	9.21429e+07	9.46196e+07	9.70964e+07	9.95731e+07	1.0205e+08	1.04527e+08	1.07003e+08	1.0948e+08	111956874	1.14434e+08	1.1691e+08	1.19387e+08	1.21864e+08	124340638	1.26817e+08	1.29294e+08	1.31771e+08	1.34248e+08	136724402	1.39201e+08	1.41678e+08	1.44155e+08	1.46631e+08	149108166	1.51585e+08	1.54062e+08	1.56538e+08	1.59015e+08	161491930	1.63969e+08	1.66445e+08	1.68922e+08	1.71399e+08	173875694
16870760	131097240	39789764	53981740	65441242	6.74438e+07	6.94463e+07	7.14489e+07	7.34514e+07	75453974	7.74565e+07	7.94591e+07	8.14616e+07	8.34642e+07	85466706	8.74693e+07	8.94718e+07	9.14743e+07	9.34769e+07	95479438	9.7482e+07	9.94845e+07	1.01487e+08	1.0349e+08	105492170	1.07495e+08	1.09497e+08	1.115e+08	1.13502e+08	115504902	1.17507e+08	1.1951e+08	1.21513e+08	1.23515e+08	125517634	1.2752e+08	1.29523e+08	1.31525e+08	1.33528e+08	135530366	1.37533e+08	1.39535e+08	1.41538e+08	1.43541e+08	145543098	1.47546e+08	1.49548e+08	1.51551e+08	1.53553e+08	155555830
6884056	59461324	40969648	40367756	57410552	6.56065e+07	7.38024e+07	8.19984e+07	9.01943e+07	98390264	1.06586e+08	1.14782e+08	1.22978e+08	1.31174e+08	139369976	1.47566e+08	1.55762e+08	1.63958e+08	1.72154e+08	180349688	1.88546e+08	1.96742e+08	2.04938e+08	2.13133e+08	221329400	2.29525e+08	2.37721e+08	2.45917e+08	2.54113e+08	262309112	2.70505e+08	2.78701e+08	2.86897e+08	2.95093e+08	303288824	3.11485e+08	3.19681e+08	3.27877e+08	3.36073e+08	344268536	3.52464e+08	3.6066e+08	3.68856e+08	3.77052e+08	385248248	3.93444e+08	4.0164e+08	4.09836e+08	4.18032e+08	426227960
15394559	215005360	69574904	92060008	1.1915e+08	1.27607e+08	1.36063e+08	1.4452e+08	1.52977e+08	161433126	1.6989e+08	1.78346e+08	1.86803e+08	1.95259e+08	2.03716e+08	2.12173e+08	2.20629e+08	2.29086e+08	2.37542e+08	245999017	2.54456e+08	2.62912e+08	2.71369e+08	2.79825e+08	2.88282e+08	2.96739e+08	3.05195e+08	3.13652e+08	3.22108e+08	330564908	3.39021e+08	3.47478e+08	3.55935e+08	3.64391e+08	3.72848e+08	3.81304e+08	3.89761e+08	3.98218e+08	4.06674e+08	415130799	4.23587e+08	4.32044e+08	4.40501e+08	4.48957e+08	4.57414e+08	4.6587e+08	4.74327e+08	4.82784e+08	4.9124e+08	499696690
18549878	91132952	75856136	13248467	41901596	3.87835e+07	3.56654e+07	3.25473e+07	2.94292e+07	2.63111e+07	2.3193e+07	2.00749e+07	1.69568e+07	1.38387e+07	10720547	7.60244e+06	4.48434e+06	1.36623e+06	-1.75187e+06	-4.86998e+06	-7.98808e+06	-1.11062e+07	-1.42243e+07	-1.73424e+07	-20460502	-2.35786e+07	-2.66967e+07	-2.98148e+07	-3.29329e+07	-3.6051e+07	-3.91691e+07	-4.22872e+07	-4.54053e+07	-4.85234e+07	-51641551	-5.47597e+07	-5.78778e+07	-6.09959e+07	-6.4114e+07	-6.72321e+07	-7.03502e+07	-7.34683e+07	-7.65864e+07	-7.97045e+07	-82822600	-8.59407e+07	-8.90588e+07	-9.21769e+07	-9.5295e+07	-9.84131e+07
5.48057e+06	9799408	9052407	29080558	3.08665e+07	3.78718e+07	4.48771e+07	5.18824e+07	5.88877e+07	65892963	7.28983e+07	7.99036e+07	8.69089e+07	9.39142e+07	1.00919e+08	1.07925e+08	1.1493e+08	1.21935e+08	1.28941e+08	1.35946e+08	1.42951e+08	1.49957e+08	1.56962e+08	1.63967e+08	1.70972e+08	1.77978e+08	1.84983e+08	1.91988e+08	1.98994e+08	205998904	2.13004e+08	2.20009e+08	2.27015e+08	2.3402e+08	2.41025e+08	2.48031e+08	2.55036e+08	2.62041e+08	2.69047e+08	2.76052e+08	2.83057e+08	2.90062e+08	2.97068e+08	3.04073e+08	3.11078e+08	3.18084e+08	3.25089e+08	3.32094e+08	3.391e+08	346104845
9118735	86925992	43957900	18799114	3.62187e+07	34826001	3.34333e+07	32040610	3.06479e+07	2.92552e+07	2.78625e+07	2.64698e+07	2.50771e+07	2.36844e+07	2.22917e+07	2.0899e+07	1.95064e+07	1.81137e+07	1.6721e+07	1.53283e+07	1.39356e+07	1.25429e+07	1.11502e+07	9.75748e+06	8.36479e+06	6.97209e+06	5.5794e+06	4.1867e+06	2.794e+06	1.40131e+06	8613.5	-1.38408e+06	-2.77678e+06	-4.16947e+06	-5.56217e+06	-6.95486e+06	-8.34756e+06	-9.74026e+06	-1.1133e+07	-1.25256e+07	-1.39183e+07	-1.5311e+07	-1.67037e+07	-1.80964e+07	-1.94891e+07	-2.08818e+07	-2.22745e+07	-2.36672e+07	-2.50599e+07	-2.64526e+07
22648946	172075968	59289344	21150422	39470621	2.77424e+07	1.60142e+07	4.28596e+06	-7.44226e+06	-19170477	-3.08987e+07	-4.26269e+07	-5.43551e+07	-6.60834e+07	-77811575	-8.95398e+07	-1.01268e+08	-1.12996e+08	-1.24724e+08	-136452673	-1.48181e+08	-1.59909e+08	-1.71637e+08	-1.83366e+08	-195093771	-2.06822e+08	-2.1855e+08	-2.30278e+08	-2.42007e+08	-253734869	-2.65463e+08	-2.77191e+08	-2.8892e+08	-3.00648e+08	-312375967	-3.24104e+08	-3.35832e+08	-3.47561e+08	-3.59289e+08	-371017065	-3.82745e+08	-3.94474e+08	-4.06202e+08	-4.1793e+08	-429658163	-4.41386e+08	-4.53115e+08	-4.64843e+08	-4.76571e+08	-488299261
24361242	134687600	71296920	22764650	46232489	3.94144e+07	3.25964e+07	2.57784e+07	1.89603e+07	1.21423e+07	5.32422e+06	-1.49383e+06	-8.31188e+06	-1.51299e+07	-2.1948e+07	-2.8766e+07	-3.55841e+07	-4.24021e+07	-4.92201e+07	-56038195	-6.28562e+07	-6.96743e+07	-7.64923e+07	-8.33104e+07	-90128423	-9.69465e+07	-1.03765e+08	-1.10583e+08	-1.17401e+08	-124218651	-1.31037e+08	-1.37855e+08	-1.44673e+08	-1.51491e+08	-158308879	-1.65127e+08	-1.71945e+08	-1.78763e+08	-1.85581e+08	-192399107	-1.99217e+08	-2.06035e+08	-2.12853e+08	-2.19671e+08	-226489335	-2.33307e+08	-2.40125e+08	-2.46943e+08	-2.53762e+08	-2.6058e+08
7219052	50435660	27407320	29736926	39831060	4.42836e+07	4.87361e+07	5.31886e+07	5.76412e+07	62093701	6.65462e+07	7.09988e+07	7.54513e+07	7.99038e+07	84356342	8.88089e+07	9.32614e+07	9.77139e+07	1.02166e+08	106618983	1.11072e+08	1.15524e+08	1.19977e+08	1.24429e+08	128881624	1.33334e+08	1.37787e+08	1.42239e+08	1.46692e+08	151144265	1.55597e+08	1.60049e+08	1.64502e+08	1.68954e+08	173406906	1.77859e+08	1.82312e+08	1.86764e+08	1.91217e+08	195669547	2.00122e+08	2.04575e+08	2.09027e+08	2.1348e+08	217932188	2.22385e+08	2.26837e+08	2.3129e+08	2.35742e+08	240194829
8.02958e+06	78003464	43067344	9766496	2.72854e+07	2.43128e+07	2.13403e+07	1.83678e+07	1.53952e+07	1.24227e+07	9.45015e+06	6.47761e+06	3.50508e+06	532538	-2.44e+06	-5.41254e+06	-8.38507e+06	-1.13576e+07	-1.43301e+07	-1.73027e+07	-2.02752e+07	-2.32478e+07	-2.62203e+07	-2.91928e+07	-3.21654e+07	-3.51379e+07	-3.81105e+07	-4.1083e+07	-4.40555e+07	-4.70281e+07	-5.00006e+07	-5.29731e+07	-5.59457e+07	-5.89182e+07	-6.18908e+07	-6.48633e+07	-6.78358e+07	-7.08084e+07	-7.37809e+07	-7.67534e+07	-7.9726e+07	-8.26985e+07	-8.56711e+07	-8.86436e+07	-9.16161e+07	-9.45887e+07	-9.75612e+07	-1.00534e+08	-1.03506e+08	-106478817
40648060	175002528	76690976	49552320	67573778	6.04139e+07	5.3254e+07	4.60941e+07	3.89343e+07	31774392	2.46145e+07	1.74546e+07	1.02948e+07	3.13488e+06	-4024994	-1.11849e+07	-1.83447e+07	-2.55046e+07	-3.26645e+07	-39824380	-4.69843e+07	-5.41441e+07	-6.1304e+07	-6.84639e+07	-75623766	-8.27836e+07	-8.99435e+07	-9.71034e+07	-1.04263e+08	-111423152	-1.18583e+08	-1.25743e+08	-1.32903e+08	-1.40063e+08	-147222538	-1.54382e+08	-1.61542e+08	-1.68702e+08	-1.75862e+08	-183021924	-1.90182e+08	-1.97342e+08	-2.04502e+08	-2.11661e+08	-218821310	-2.25981e+08	-2.33141e+08	-2.40301e+08	-2.47461e+08	-254620696
16888090	195101952	86123736	32199850	66817673	6.05134e+07	5.42091e+07	4.79048e+07	4.16005e+07	35296205	2.89919e+07	2.26876e+07	1.63833e+07	1.0079e+07	3774737	-2.52956e+06	-8.83385e+06	-1.51381e+07	-2.14424e+07	-27746731	-3.4051e+07	-4.03553e+07	-4.66596e+07	-5.29639e+07	-59268199	-6.55725e+07	-7.18768e+07	-7.81811e+07	-8.44854e+07	-90789667	-9.7094e+07	-1.03398e+08	-1.09703e+08	-1.16007e+08	-122311135	-1.28615e+08	-1.3492e+08	-1.41224e+08	-1.47528e+08	-153832603	-1.60137e+08	-1.66441e+08	-1.72745e+08	-1.7905e+08	-185354071	-1.91658e+08	-1.97963e+08	-2.04267e+08	-2.10571e+08	-216875539
7.35305e+06	66350464	36055172	26426250	4.07773e+07	4.34697e+07	4.61622e+07	4.88546e+07	5.1547e+07	54239456	5.69319e+07	5.96243e+07	6.23167e+07	6.50092e+07	6.77016e+07	7.0394e+07	7.30865e+07	7.57789e+07	7.84713e+07	8.11638e+07	8.38562e+07	8.65486e+07	8.9241e+07	9.19335e+07	9.46259e+07	9.73183e+07	1.00011e+08	1.02703e+08	1.05396e+08	108088045	1.1078e+08	1.13473e+08	1.16165e+08	1.18858e+08	1.2155e+08	1.24243e+08	1.26935e+08	1.29627e+08	1.3232e+08	1.35012e+08	1.37705e+08	1.40397e+08	1.4309e+08	1.45782e+08	1.48474e+08	1.51167e+08	1.53859e+08	1.56552e+08	1.59244e+08	161936634
14174923	116038648	52346172	34022848	5.31085e+07	5.26936e+07	5.22787e+07	5.18639e+07	5.1449e+07	5.10341e+07	5.06193e+07	5.02044e+07	4.97895e+07	4.93746e+07	4.89598e+07	4.85449e+07	4.813e+07	4.77152e+07	4.73003e+07	4.68854e+07	4.64706e+07	4.60557e+07	4.56408e+07	4.52259e+07	4.48111e+07	4.43962e+07	4.39813e+07	4.35665e+07	4.31516e+07	4.27367e+07	4.23218e+07	4.1907e+07	4.14921e+07	4.10772e+07	4.06624e+07	4.02475e+07	3.98326e+07	3.94178e+07	3.90029e+07	3.8588e+07	3.81731e+07	3.77583e+07	3.73434e+07	3.69285e+07	3.65137e+07	3.60988e+07	3.56839e+07	3.52691e+07	3.48542e+07	3.44393e+07
11150643	152401984	54507488	27651626	4.933e+07	4.44909e+07	3.96517e+07	3.48126e+07	2.99734e+07	25134275	2.02951e+07	1.5456e+07	1.06168e+07	5.77766e+06	938501	-3.90065e+06	-8.73981e+06	-1.3579e+07	-1.84181e+07	-2.32573e+07	-2.80964e+07	-3.29356e+07	-3.77747e+07	-4.26139e+07	-4.7453e+07	-5.22922e+07	-5.71314e+07	-6.19705e+07	-6.68097e+07	-71648819	-7.6488e+07	-8.13271e+07	-8.61663e+07	-9.10054e+07	-9.58446e+07	-1.00684e+08	-1.05523e+08	-1.10362e+08	-1.15201e+08	-120040366	-1.2488e+08	-1.29719e+08	-1.34558e+08	-1.39397e+08	-1.44236e+08	-1.49075e+08	-1.53914e+08	-1.58754e+08	-1.63593e+08	-168431913
36019084	238296208	63142236	72866280	86427856	7.99666e+07	7.35054e+07	6.70441e+07	6.05829e+07	54121664	4.76604e+07	4.11992e+07	3.47379e+07	2.82767e+07	2.18155e+07	1.53542e+07	8.893e+06	2.43176e+06	-4.02948e+06	-10490720	-1.6952e+07	-2.34132e+07	-2.98744e+07	-3.63357e+07	-42796912	-4.92582e+07	-5.57194e+07	-6.21806e+07	-6.86419e+07	-75103104	-8.15643e+07	-8.80256e+07	-9.44868e+07	-1.00948e+08	-107409296	-1.13871e+08	-1.20332e+08	-1.26793e+08	-1.33254e+08	-139715488	-1.46177e+08	-1.52638e+08	-1.59099e+08	-1.6556e+08	-172021680	-1.78483e+08	-1.84944e+08	-1.91405e+08	-1.97867e+08	-204327872
4.64154e+06	59741444	47992116	20331034	4.20063e+07	45538237	4.90702e+07	5.26021e+07	5.6134e+07	59665898	6.31978e+07	6.67297e+07	7.02616e+07	73793559	7.73255e+07	8.08574e+07	8.43893e+07	87921220	9.14531e+07	9.49851e+07	9.8517e+07	102048881	1.05581e+08	1.09113e+08	1.12645e+08	116176542	1.19708e+08	1.2324e+08	1.26772e+08	130304203	1.33836e+08	1.37368e+08	1.409e+08	144431864	1.47964e+08	1.51496e+08	1.55028e+08	158559525	1.62091e+08	1.65623e+08	1.69155e+08	172687186	1.76219e+08	1.79751e+08	1.83283e+08	186814847	1.90347e+08	1.93879e+08	1.97411e+08	200942508
4.99342e+06	77808624	25106402	9718515	1.9775e+07	1.59223e+07	1.20696e+07	8.21692e+06	4.36423e+06	511530	-3.34116e+06	-7.19386e+06	-1.10466e+07	-1.48992e+07	-1.87519e+07	-22604638	-2.64573e+07	-3.031e+07	-3.41627e+07	-3.80154e+07	-4.18681e+07	-4.57208e+07	-4.95735e+07	-5.34262e+07	-5.72789e+07	-6.11316e+07	-6.49843e+07	-68836975	-7.26897e+07	-7.65424e+07	-8.03951e+07	-84247754	-8.81004e+07	-9.19531e+07	-9.58058e+07	-99658533	-1.03511e+08	-1.07364e+08	-1.11217e+08	-115069312	-1.18922e+08	-1.22775e+08	-1.26627e+08	-130480091	-1.34333e+08	-1.38185e+08	-1.42038e+08	-145890870	-1.49744e+08	-1.53596e+08
5.60561e+06	43616032	19293842	10513657	1.73578e+07	1.6398e+07	1.54382e+07	1.44784e+07	1.35186e+07	1.25587e+07	1.15989e+07	1.06391e+07	9.67933e+06	8.71953e+06	7.75972e+06	6.79992e+06	5.84011e+06	4.88031e+06	3.9205e+06	2960697	2.00089e+06	1.04109e+06	81281.8	-878523	-1.83833e+06	-2.79813e+06	-3.75794e+06	-4.71774e+06	-5.67755e+06	-6.63735e+06	-7.59716e+06	-8.55696e+06	-9.51677e+06	-1.04766e+07	-1.14364e+07	-1.23962e+07	-1.3356e+07	-1.43158e+07	-1.52756e+07	-16235404	-1.71952e+07	-1.8155e+07	-1.91148e+07	-2.00746e+07	-2.10344e+07	-2.19942e+07	-2.2954e+07	-2.39138e+07	-2.48736e+07	-2.58335e+07
9751809	53380292	28178194	25276154	3.44893e+07	3.66264e+07	3.87635e+07	4.09006e+07	4.30377e+07	45174815	4.73119e+07	4.9449e+07	5.15861e+07	5.37232e+07	5.58603e+07	5.79974e+07	6.01345e+07	6.22716e+07	6.44087e+07	66545752	6.86828e+07	7.08199e+07	7.2957e+07	7.50941e+07	7.72312e+07	7.93683e+07	8.15054e+07	8.36425e+07	8.57796e+07	87916689	9.00538e+07	9.21909e+07	9.4328e+07	9.64651e+07	9.86022e+07	1.00739e+08	1.02876e+08	1.05013e+08	1.07151e+08	109287626	1.11425e+08	1.13562e+08	1.15699e+08	1.17836e+08	1.19973e+08	1.2211e+08	1.24247e+08	1.26384e+08	1.28521e+08	130658563
12920548	122680552	67108888	34361320	61455490	6.23306e+07	6.32056e+07	6.40807e+07	6.49558e+07	65830816	6.67059e+07	6.75809e+07	6.8456e+07	6.93311e+07	70206142	7.10812e+07	7.19563e+07	7.28313e+07	7.37064e+07	74581468	7.54565e+07	7.63316e+07	7.72067e+07	7.80817e+07	78956794	7.98319e+07	8.07069e+07	8.1582e+07	8.24571e+07	83332120	8.42072e+07	8.50823e+07	8.59573e+07	8.68324e+07	87707446	8.85825e+07	8.94576e+07	9.03326e+07	9.12077e+07	92082772	9.29578e+07	9.38329e+07	9.4708e+07	9.5583e+07	96458098	9.73332e+07	9.82082e+07	9.90833e+07	9.99584e+07	100833424
11066983	57225280	22130234	21132622	2.66642e+07	2.61744e+07	2.56846e+07	2.51948e+07	2.4705e+07	24215183	2.37254e+07	2.32356e+07	2.27457e+07	2.22559e+07	2.17661e+07	2.12763e+07	2.07865e+07	2.02967e+07	1.98069e+07	19317054	1.88272e+07	1.83374e+07	1.78476e+07	1.73578e+07	1.6868e+07	1.63782e+07	1.58884e+07	1.53986e+07	1.49087e+07	1.44189e+07	1.39291e+07	1.34393e+07	1.29495e+07	1.24597e+07	1.19699e+07	1.148e+07	1.09902e+07	1.05004e+07	1.00106e+07	9.5208e+06	9.03098e+06	8.54117e+06	8.05136e+06	7.56154e+06	7.07173e+06	6.58192e+06	6.09211e+06	5.60229e+06	5.11248e+06	4.62267e+06
6219842	81673160	34077564	18122742	32051603	3.08629e+07	2.96742e+07	2.84855e+07	2.72968e+07	26108155	2.49195e+07	2.37308e+07	2.25421e+07	2.13534e+07	20164707	1.8976e+07	1.77873e+07	1.65986e+07	1.54099e+07	14221259	1.30326e+07	1.18439e+07	1.06552e+07	9.4665e+06	8.27781e+06	7.08912e+06	5.90043e+06	4.71174e+06	3.52305e+06	2.33436e+06	1.14567e+06	-43016.2	-1.23171e+06	-2.4204e+06	-3.60909e+06	-4.79777e+06	-5.98646e+06	-7.17515e+06	-8.36384e+06	-9.55253e+06	-1.07412e+07	-1.19299e+07	-1.31186e+07	-1.43073e+07	-1.5496e+07	-1.66847e+07	-1.78734e+07	-1.9062e+07	-2.02507e+07	-2.14394e+07
4.47571e+06	83145200	35992188	42463780	5.8222e+07	6.49031e+07	7.15843e+07	7.82654e+07	8.49465e+07	91627609	9.83087e+07	1.0499e+08	1.11671e+08	1.18352e+08	1.25033e+08	1.31714e+08	1.38395e+08	1.45077e+08	1.51758e+08	1.58439e+08	1.6512e+08	1.71801e+08	1.78482e+08	1.85163e+08	1.91844e+08	1.98526e+08	2.05207e+08	2.11888e+08	2.18569e+08	225249978	2.31931e+08	2.38612e+08	2.45293e+08	2.51974e+08	2.58656e+08	2.65337e+08	2.72018e+08	2.78699e+08	2.8538e+08	2.92061e+08	2.98742e+08	3.05423e+08	3.12105e+08	3.18786e+08	3.25467e+08	3.32148e+08	3.38829e+08	3.4551e+08	3.52191e+08	358872347
11411892	149076016	117240920	17808824	70723338	69458908	68194478	66930048	65665618	64401188	63136758	61872328	60607898	59343468	58079038	56814608	55550178	54285748	53021318	51756888	50492458	49228028	47963598	46699168	45434738	44170308	42905878	41641448	40377018	39112588	37848158	36583728	35319298	34054868	32790438	3.1526e+07	3.02616e+07	2.89971e+07	2.77327e+07	2.64683e+07	2.52039e+07	2.39394e+07	2.2675e+07	2.14106e+07	2.01461e+07	1.88817e+07	1.76173e+07	1.63528e+07	1.50884e+07	1.3824e+07
14917269	77035696	34389428	24401856	3.41379e+07	3.27187e+07	3.12994e+07	2.98802e+07	2.84609e+07	27041682	2.56224e+07	2.42032e+07	2.27839e+07	2.13647e+07	1.99454e+07	1.85262e+07	1.71069e+07	1.56877e+07	1.42684e+07	12849175	1.14299e+07	1.00107e+07	8.59142e+06	7.17217e+06	5.75292e+06	4.33367e+06	2.91442e+06	1.49517e+06	75918.7	-1343332	-2.76258e+06	-4.18183e+06	-5.60108e+06	-7.02033e+06	-8.43959e+06	-9.85884e+06	-1.12781e+07	-1.26973e+07	-1.41166e+07	-1.55358e+07	-1.69551e+07	-1.83743e+07	-1.97936e+07	-2.12128e+07	-2.26321e+07	-2.40513e+07	-2.54706e+07	-2.68898e+07	-2.83091e+07	-2.97283e+07
8017088	98512704	36541488	25712630	39974830	39086371	38197912	37309453	36420994	35532535	34644076	33755617	32867158	31978699	31090240	30201781	29313322	28424863	27536404	26647945	25759486	24871027	23982568	23094109	22205650	21317191	20428732	19540273	18651814	17763355	16874896	15986437	15097978	14209519	13321060	12432601	11544142	10655683	9767224	8878765	7990306	7101847	6213388	5324929	4436470	3548011	2659552	1771093	882634	-5825
5095190	109885920	67482440	31825854	63019479	6.67983e+07	7.05772e+07	7.4356e+07	7.81349e+07	8.19137e+07	8.56926e+07	8.94714e+07	9.32503e+07	9.70291e+07	100807991	1.04587e+08	1.08366e+08	1.12145e+08	1.15923e+08	119702247	1.23481e+08	1.2726e+08	1.31039e+08	1.34818e+08	138596503	1.42375e+08	1.46154e+08	1.49933e+08	1.53712e+08	157490759	1.6127e+08	1.65048e+08	1.68827e+08	1.72606e+08	176385015	1.80164e+08	1.83943e+08	1.87722e+08	1.915e+08	195279271	1.99058e+08	2.02837e+08	2.06616e+08	2.10395e+08	214173527	2.17952e+08	2.21731e+08	2.2551e+08	2.29289e+08	233067783
30180902	181324304	44087456	41389680	48342957	3.79819e+07	2.76209e+07	1.72598e+07	6.89875e+06	-3.4623e+06	-1.38234e+07	-2.41844e+07	-3.45455e+07	-4.49065e+07	-55267557	-6.56286e+07	-7.59897e+07	-8.63507e+07	-9.67118e+07	-107072814	-1.17434e+08	-1.27795e+08	-1.38156e+08	-1.48517e+08	-158878071	-1.69239e+08	-1.796e+08	-1.89961e+08	-2.00322e+08	-210683328	-2.21044e+08	-2.31405e+08	-2.41766e+08	-2.52128e+08	-262488585	-2.7285e+08	-2.83211e+08	-2.93572e+08	-3.03933e+08	-314293842	-3.24655e+08	-3.35016e+08	-3.45377e+08	-3.55738e+08	-366099099	-3.7646e+08	-3.86821e+08	-3.97182e+08	-4.07543e+08	-4.17904e+08
45459756	221860912	73862488	58062996	72264362	6.12455e+07	5.02266e+07	3.92078e+07	2.81889e+07	1.717e+07	6.15114e+06	-4.86773e+06	-1.58866e+07	-2.69055e+07	-37924342	-4.89432e+07	-5.99621e+07	-7.0981e+07	-8.19998e+07	-93018694	-1.04038e+08	-1.15056e+08	-1.26075e+08	-1.37094e+08	-148113046	-1.59132e+08	-1.70151e+08	-1.8117e+08	-1.92189e+08	-203207398	-2.14226e+08	-2.25245e+08	-2.36264e+08	-2.47283e+08	-258301750	-2.69321e+08	-2.80339e+08	-2.91358e+08	-3.02377e+08	-313396102	-3.24415e+08	-3.35434e+08	-3.46453e+08	-3.57472e+08	-368490454	-3.79509e+08	-3.90528e+08	-4.01547e+08	-4.12566e+08	-423584806
31034864	196150576	65424224	89734440	106929120	1.11466e+08	1.16004e+08	1.20541e+08	1.25078e+08	129615308	1.34153e+08	1.3869e+08	1.43227e+08	1.47764e+08	152301496	1.56839e+08	1.61376e+08	1.65913e+08	1.7045e+08	174987684	1.79525e+08	1.84062e+08	1.88599e+08	1.93137e+08	197673872	2.02211e+08	2.06748e+08	2.11286e+08	2.15823e+08	220360060	2.24897e+08	2.29435e+08	2.33972e+08	2.38509e+08	243046248	2.47583e+08	2.52121e+08	2.56658e+08	2.61195e+08	265732436	2.7027e+08	2.74807e+08	2.79344e+08	2.83881e+08	288418624	2.92956e+08	2.97493e+08	3.0203e+08	3.06568e+08	311104812
7554040	88977472	65918788	15268555	44450929	4.44594e+07	4.44679e+07	4.44764e+07	4.44849e+07	4.44934e+07	4.45018e+07	4.45103e+07	4.45188e+07	4.45273e+07	44535790	4.45443e+07	4.45528e+07	4.45612e+07	4.45697e+07	4.45782e+07	4.45867e+07	4.45952e+07	4.46037e+07	4.46122e+07	44620651	4.46291e+07	4.46376e+07	4.46461e+07	4.46546e+07	4.46631e+07	4.46716e+07	4.46801e+07	4.46885e+07	4.4697e+07	44705512	4.4714e+07	4.47225e+07	4.4731e+07	4.47395e+07	4.47479e+07	4.47564e+07	4.47649e+07	4.47734e+07	4.47819e+07	4.47904e+07	4.47989e+07	4.48073e+07	4.48158e+07	4.48243e+07	4.48328e+07
8.35433e+06	154110656	48473008	46410292	6.64696e+07	6.73227e+07	6.81757e+07	6.90287e+07	6.98817e+07	70734759	7.15878e+07	7.24408e+07	7.32938e+07	7.41469e+07	7.49999e+07	7.58529e+07	7.67059e+07	7.7559e+07	7.8412e+07	7.9265e+07	8.0118e+07	8.09711e+07	8.18241e+07	8.26771e+07	8.35301e+07	8.43832e+07	8.52362e+07	8.60892e+07	8.69422e+07	8.77953e+07	8.86483e+07	8.95013e+07	9.03543e+07	9.12074e+07	9.20604e+07	9.29134e+07	9.37664e+07	9.46195e+07	9.54725e+07	9.63255e+07	9.71785e+07	9.80316e+07	9.88846e+07	9.97376e+07	1.00591e+08	1.01444e+08	1.02297e+08	1.0315e+08	1.04003e+08	104855765
63951436	182717232	63415040	67060036	66791838	5.57942e+07	4.47966e+07	3.37989e+07	2.28013e+07	1.18036e+07	806003	-1.01916e+07	-2.11893e+07	-3.21869e+07	-43184554	-5.41822e+07	-6.51798e+07	-7.61775e+07	-8.71751e+07	-98172750	-1.0917e+08	-1.20168e+08	-1.31166e+08	-1.42163e+08	-153160946	-1.64159e+08	-1.75156e+08	-1.86154e+08	-1.97152e+08	-208149142	-2.19147e+08	-2.30144e+08	-2.41142e+08	-2.5214e+08	-263137338	-2.74135e+08	-2.85133e+08	-2.9613e+08	-3.07128e+08	-318125534	-3.29123e+08	-3.40121e+08	-3.51118e+08	-3.62116e+08	-3.73114e+08	-3.84111e+08	-3.95109e+08	-4.06107e+08	-4.17104e+08	-4.28102e+08
11301609	97735368	57409356	60009492	8.30634e+07	9.36431e+07	1.04223e+08	1.14803e+08	1.25382e+08	135962184	1.46542e+08	1.57122e+08	1.67701e+08	1.78281e+08	1.88861e+08	1.99441e+08	2.10021e+08	2.206e+08	2.3118e+08	241759821	2.5234e+08	2.62919e+08	2.73499e+08	2.84079e+08	2.94659e+08	3.05238e+08	3.15818e+08	3.26398e+08	3.36978e+08	347557458	3.58137e+08	3.68717e+08	3.79297e+08	3.89877e+08	4.00456e+08	4.11036e+08	4.21616e+08	4.32196e+08	4.42775e+08	453355095	4.63935e+08	4.74515e+08	4.85094e+08	4.95674e+08	5.06254e+08	5.16834e+08	5.27413e+08	5.37993e+08	5.48573e+08	559152732
6847568	56730284	24034512	40445196	49038668	5.58484e+07	6.26581e+07	6.94678e+07	7.62775e+07	83087224	8.98969e+07	9.67066e+07	1.03516e+08	1.10326e+08	117135780	1.23945e+08	1.30755e+08	1.37565e+08	1.44375e+08	151184336	1.57994e+08	1.64804e+08	1.71613e+08	1.78423e+08	185232892	1.92043e+08	1.98852e+08	2.05662e+08	2.12472e+08	219281448	2.26091e+08	2.32901e+08	2.39711e+08	2.4652e+08	253330004	2.6014e+08	2.66949e+08	2.73759e+08	2.80569e+08	287378560	2.94188e+08	3.00998e+08	3.07808e+08	3.14617e+08	321427116	3.28237e+08	3.35047e+08	3.41856e+08	3.48666e+08	355475672
8.21609e+06	74760512	42332516	46002272	6.30605e+07	7.11535e+07	7.92466e+07	8.73396e+07	9.54327e+07	103525751	1.11619e+08	1.19712e+08	1.27805e+08	1.35898e+08	1.43991e+08	1.52084e+08	1.60177e+08	1.6827e+08	1.76363e+08	1.84456e+08	1.92549e+08	2.00642e+08	2.08735e+08	2.16829e+08	2.24922e+08	2.33015e+08	2.41108e+08	2.49201e+08	2.57294e+08	265386824	2.7348e+08	2.81573e+08	2.89666e+08	2.97759e+08	3.05852e+08	3.13945e+08	3.22038e+08	3.30131e+08	3.38224e+08	3.46317e+08	3.5441e+08	3.62503e+08	3.70597e+08	3.7869e+08	3.86783e+08	3.94876e+08	4.02969e+08	4.11062e+08	4.19155e+08	427247897
7.24535e+06	79613064	39056268	21018554	3.6924e+07	37000291	3.70766e+07	3.71529e+07	3.72291e+07	37305412	3.73817e+07	3.7458e+07	3.75343e+07	37610533	3.76868e+07	3.77631e+07	3.78394e+07	37915654	3.79919e+07	3.80682e+07	3.81445e+07	38220775	3.82971e+07	3.83733e+07	3.84496e+07	38525896	3.86022e+07	3.86785e+07	3.87547e+07	38831017	3.89073e+07	3.89836e+07	3.90599e+07	39136138	3.92124e+07	3.92887e+07	3.9365e+07	39441259	3.95175e+07	3.95938e+07	3.96701e+07	39746380	3.98227e+07	3.98989e+07	3.99752e+07	40051501	4.01278e+07	4.02041e+07	4.02803e+07	40356622
31269850	250332592	121601336	47837292	93003035	85100142	77197249	6.92944e+07	6.13915e+07	5.34886e+07	4.55857e+07	3.76828e+07	2.97799e+07	21876998	13974105	6071212	-1831681	-9734574	-17637467	-25540360	-33443253	-41346146	-49249039	-57151932	-65054825	-72957718	-80860611	-88763504	-96666397	-104569290	-112472183	-120375076	-128277969	-136180862	-144083755	-151986648	-159889541	-167792434	-175695327	-183598220	-191501113	-199404006	-207306899	-215209792	-223112685	-231015578	-238918471	-246821364	-254724257	-262627150
3.72014e+06	62770484	45736492	32005242	5.30134e+07	59795552	6.65777e+07	7.33598e+07	8.01419e+07	8.69241e+07	9.37062e+07	1.00488e+08	1.0727e+08	114052611	1.20835e+08	1.27617e+08	1.34399e+08	1.41181e+08	1.47963e+08	1.54745e+08	1.61528e+08	168309670	1.75092e+08	1.81874e+08	1.88656e+08	1.95438e+08	2.0222e+08	2.09002e+08	2.15785e+08	222566729	2.29349e+08	2.36131e+08	2.42913e+08	2.49695e+08	2.56477e+08	2.6326e+08	2.70042e+08	276823788	2.83606e+08	2.90388e+08	2.9717e+08	3.03952e+08	3.10734e+08	3.17517e+08	3.24299e+08	331080847	3.37863e+08	3.44645e+08	3.51427e+08	3.58209e+08
7.27978e+06	112279104	50233100	29326182	5.08028e+07	5.12122e+07	5.16215e+07	5.20308e+07	5.24401e+07	5.28494e+07	5.32588e+07	5.36681e+07	5.40774e+07	5.44867e+07	5.4896e+07	5.53054e+07	5.57147e+07	5.6124e+07	5.65333e+07	5.69426e+07	5.7352e+07	5.77613e+07	5.81706e+07	5.85799e+07	5.89892e+07	5.93986e+07	5.98079e+07	6.02172e+07	6.06265e+07	6.10359e+07	6.14452e+07	6.18545e+07	6.22638e+07	6.26731e+07	6.30825e+07	6.34918e+07	6.39011e+07	6.43104e+07	6.47197e+07	6.51291e+07	6.55384e+07	6.59477e+07	6.6357e+07	6.67663e+07	6.71757e+07	6.7585e+07	6.79943e+07	6.84036e+07	6.88129e+07	6.92223e+07
[truncated: 137 more columns]
